# Supplementary material for: A robust SNP barcode for typing Mycobacterium tuberculosis complex strains
Source: PubMed Central journal article supplement (PMC4166679; doi:10.1038/ncomms5812), 2014-09-01
Supplement: ncomms5812-s1.pdf [file ncomms5812-s1.pdf]

## Supplementary Figure 1

(A) Summary of functional categories for 3 sets of SNPs: all (n=91648, left), lineage-specific (n=6915, middle) and filtered/diagnostic lineage-specific (n=413, right) (B) Lineage-specific SNPs distribution for each of the main six MTBC lineages across gene functional categories (1-7).

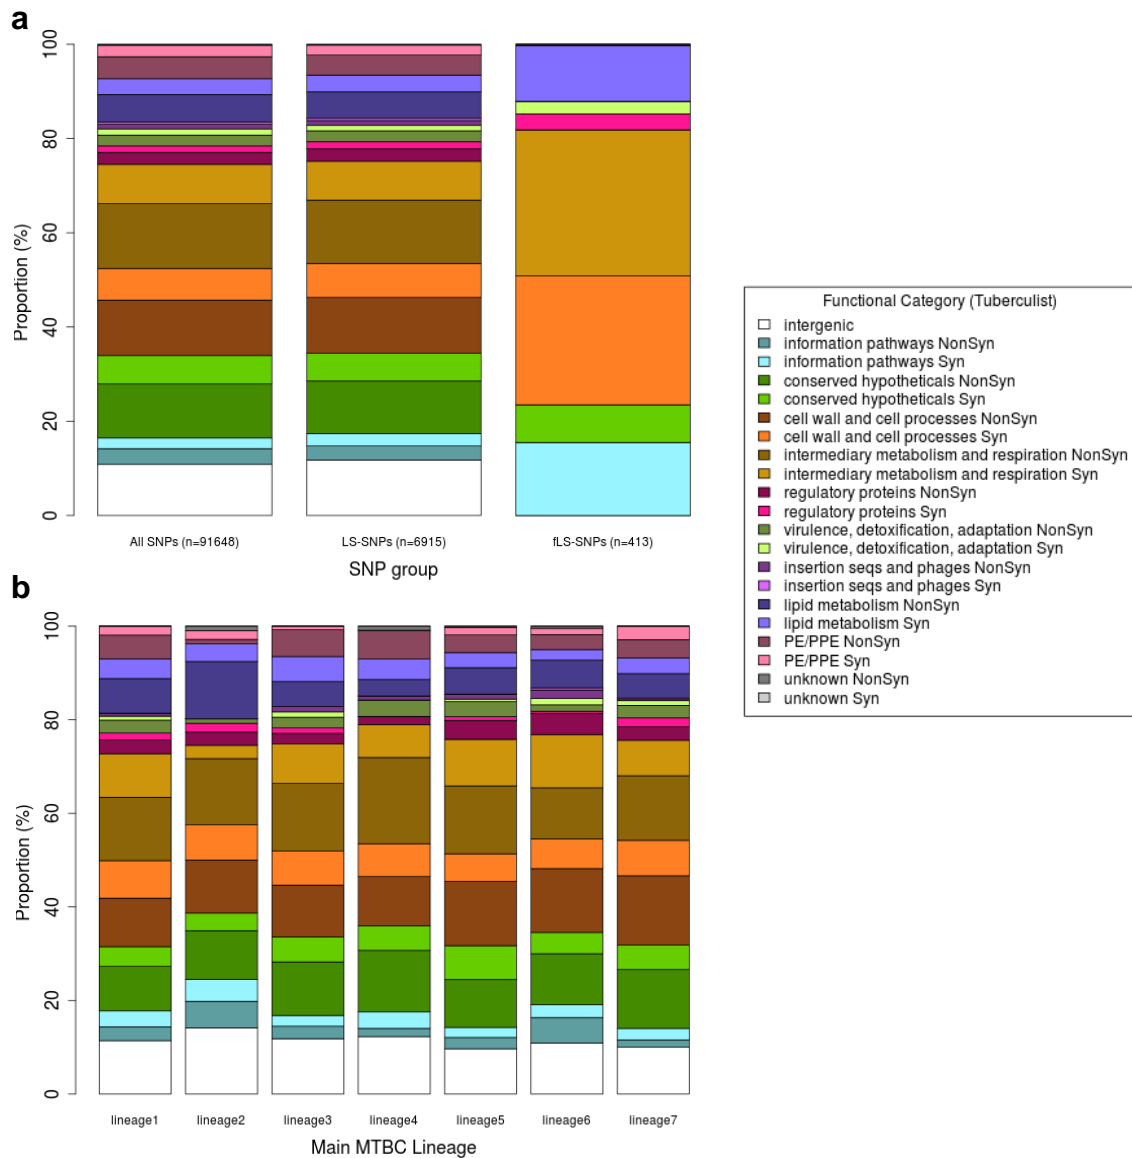

## Supplementary Figure 2

### SNP Allele Frequency Spectrum

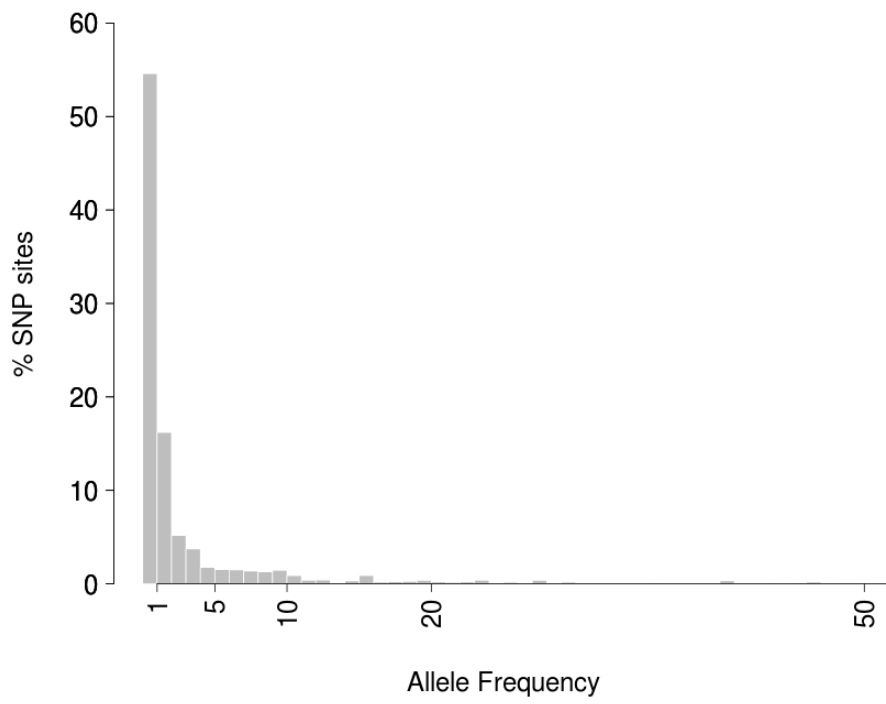

### Supplementary Figure 3

Global phylogeny constructed using the proposed minimum set of 62 SNPs separates all 1601 samples into their corresponding lineage and sub-lineage.

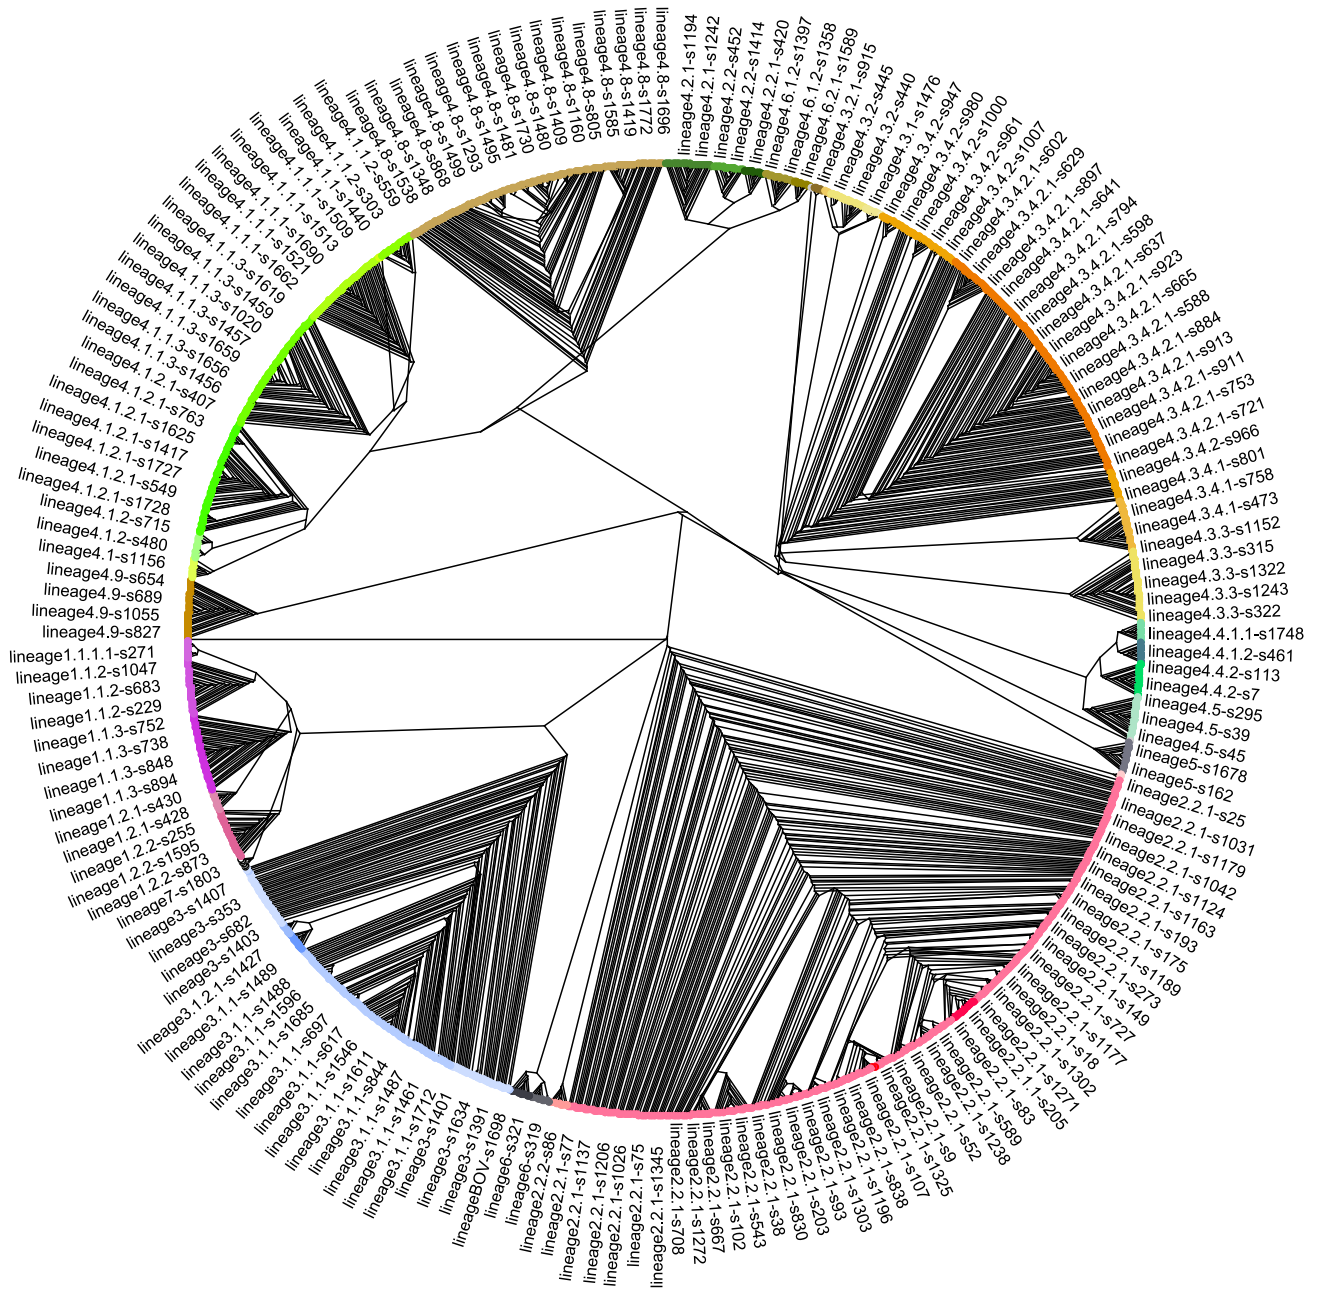

## Supplementary Figure 4

Global phylogeny constructed using the set of 45 SNPs proposed by <sup>24</sup> yielded an incompatible classification compared to that obtained by Comas93 (Supplementary Figure 5) and Homolka71 (Supplementary Figure 6). The MTBC lineages could not be unambiguously separated (lineages 1, 5, 6 and *M. bovis*) or were spread across multiple clades (lineages 2, 3 and 4).

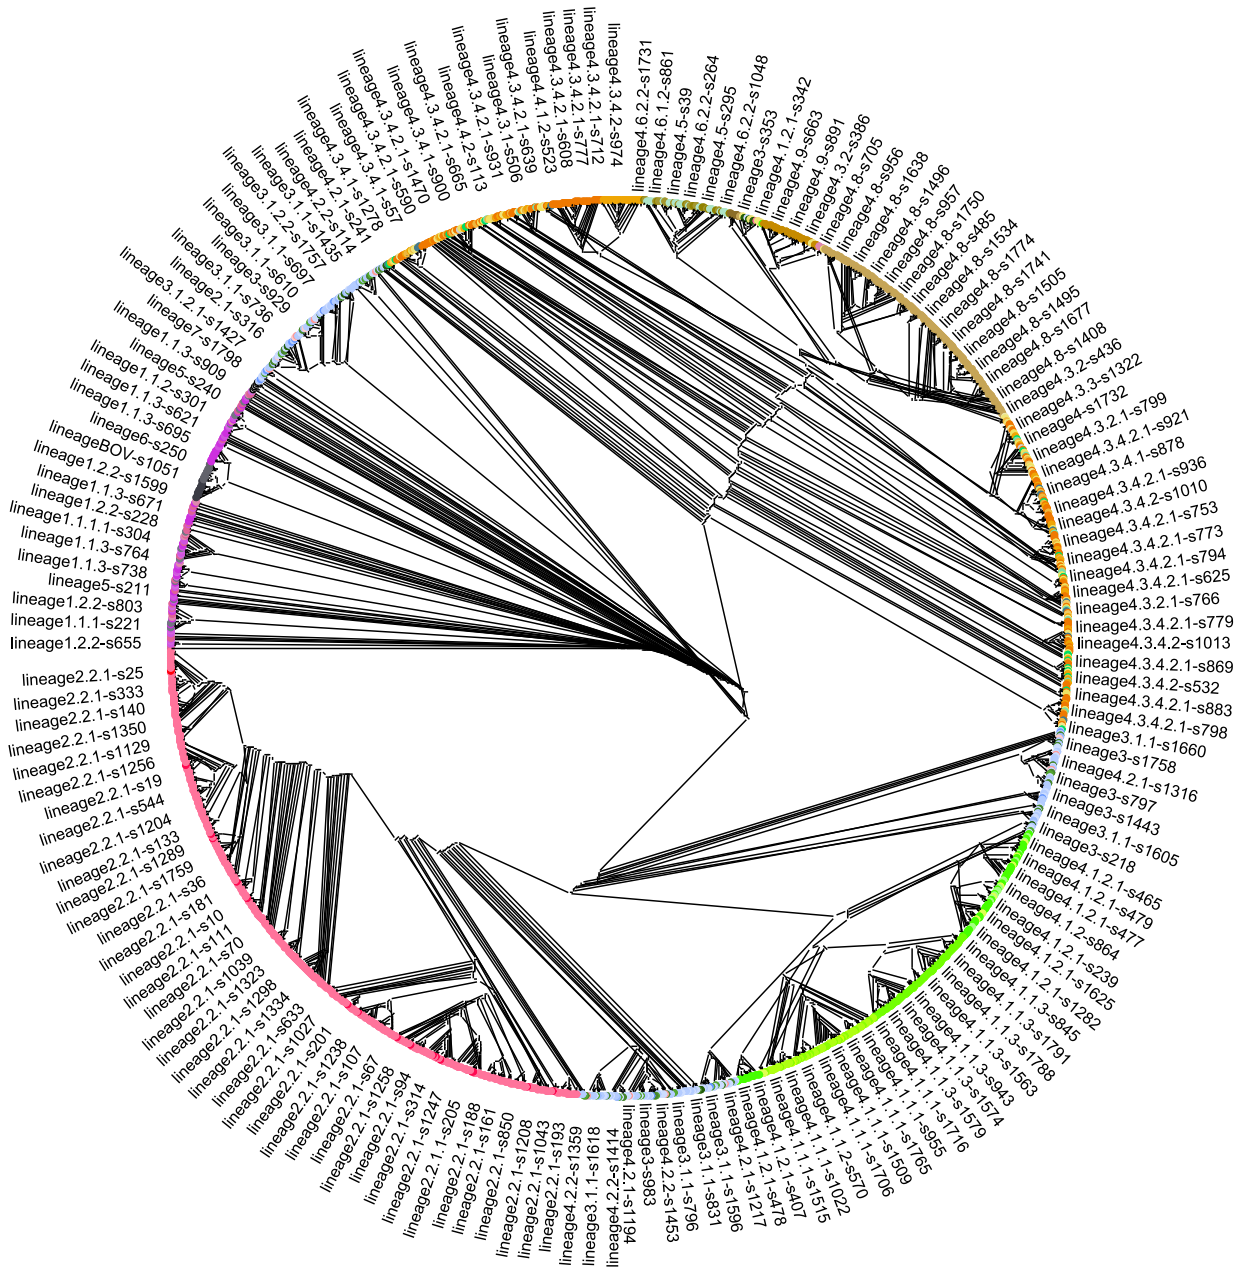

## Supplementary Figure 5

A global phylogeny constructed using the 93 lineage-specific SNPs proposed by <sup>25</sup> shows all 6 MTBC main lineages and *M. bovis* unambiguously separated in different clades. Samples from sub-lineage 2.1 (non-Beijing), 2.2 (Beijing), 4.3 (LAM), 4.1.1 (X-family), 4.1.2.1 (Haarlem), 4.6.2.2 (Cameroon) and 4.6.1 (Uganda) were all constrained to specific clades. However, the markers lacked resolution at a sub-lineage level, with the majority being unresolvable.

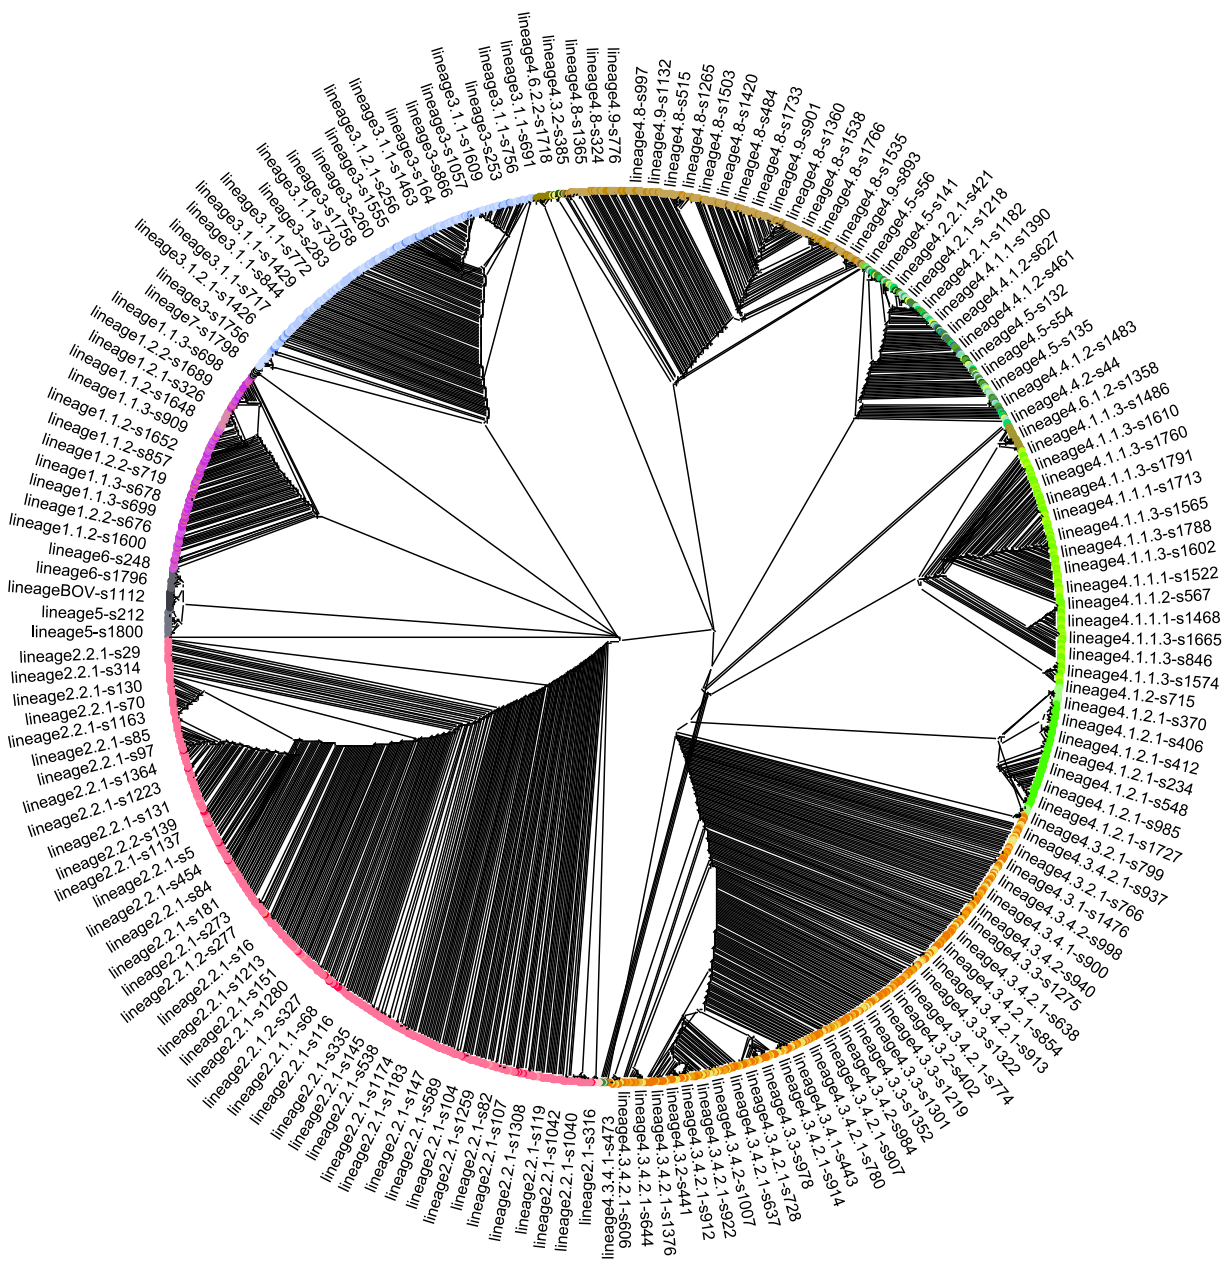

## Supplementary Figure 6

Global phylogeny constructed using the 71 phylogenetically informative SNPs proposed by <sup>26</sup>. The phylogeny is largely congruent with that built using Comas93 SNP set; all main seven MTBC lineages are clearly separated. Samples belonging to sub-lineages 4.2.1 (Ural), 4.2.2.1 (TUR), 4.3 (LAM), 4.4.1.1 (S-type), 4.1.2.1 (Haarlem) and 4.6.2.2 (Cameroon) are all restricted to specific clades. However other sub-lineages (particularly from lineage 4) were not congruent with the RD system with some samples with the same RD (e.g. RD115 for 4.3.3 sub-lineage) spread across different clades.

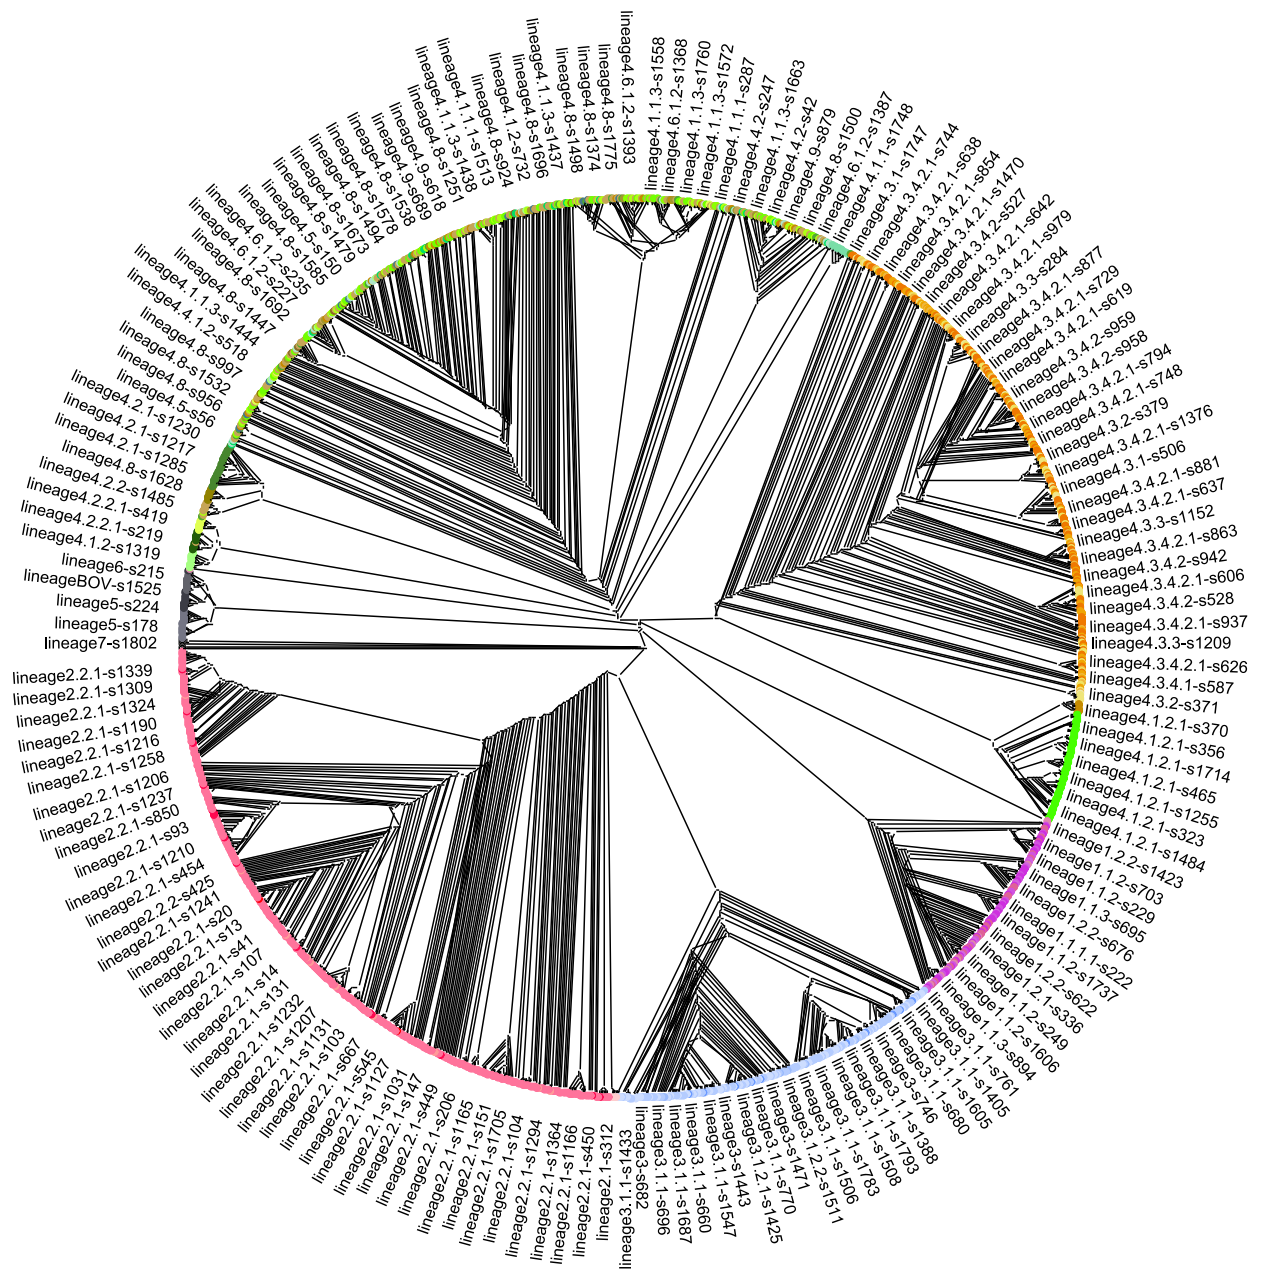

## Supplementary Table 1

The 1601 MTBC isolates in this study and their lineages

| Study*                | <i>n</i>     | # SNPs       | Lin. 1     | Lin. 2      | Lin. 3      | Lin. 4      | Lin. 5     | Lin. 6     | Lin. 7     | <i>M. bovis</i> |
|-----------------------|--------------|--------------|------------|-------------|-------------|-------------|------------|------------|------------|-----------------|
|                       |              |              | %          | %           | %           | %           | %          | %          | %          | %               |
| Canada                | 19           | 1,021        | 0          | 0           | 0           | 100         | 0          | 0          | 0          | 0               |
| China <sup>1</sup>    | 161          | 19,314       | 0          | 75.8        | 1.2         | 23.0        | 0          | 0          | 0          | 0               |
| Global                | 166          | 30,770       | 14.5       | 34.9        | 12.7        | 24.1        | 7.8        | 5.4        | 0          | 0.6             |
| Malawi                | 338          | 19,240       | 18.9       | 5.6         | 14.8        | 60.7        | 0          | 0          | 0          | 0               |
| Netherlands           | 125          | 8,635        | 4.0        | 16.8        | 0.8         | 78.4        | 0          | 0          | 0          | 0               |
| Portugal              | 81           | 7,163        | 0          | 6.2         | 1.2         | 92.6        | 0          | 0          | 0          | 0               |
| Russia                | 259          | 18,699       | 1.5        | 58.7        | 1.9         | 35.9        | 0.4        | 0          | 0          | 1.5             |
| Uganda                | 51           | 8,019        | 2.0        | 2.0         | 27.5        | 68.6        | 0          | 0          | 0          | 0               |
| UK                    | 390          | 19,408       | 5.9        | 2.6         | 24.4        | 65.1        | 0.5        | 0          | 0          | 1.5             |
| Ethiopia <sup>2</sup> | 4            | 2345         | 0          | 0           | 0           | 0           | 0          | 0          | 100        | 0               |
| Djibouti <sup>3</sup> | 7            | 5445         | 0          | 28.6        | 0           | 0           | 14.3       | 28.6       | 28.6       | 0               |
| <b>Overall</b>        | <b>1,601</b> | <b>91648</b> | <b>7.5</b> | <b>24.4</b> | <b>11.8</b> | <b>53.4</b> | <b>1.1</b> | <b>0.7</b> | <b>0.4</b> | <b>0.7</b>      |

\* See <sup>4</sup>

## Supplementary Table 2

### Lineage characteristics

| Characteristics      | 1                   | 2                          | 3             | 4                                                      | 5                                      | 6                                      | 7           |
|----------------------|---------------------|----------------------------|---------------|--------------------------------------------------------|----------------------------------------|----------------------------------------|-------------|
| <i>n</i>             | 121                 | 390                        | 189           | 856                                                    | 17                                     | 11                                     | 6           |
| Description          | East-African-Indian | East-Asian                 | Indo-Oceanic  | Euro-American                                          | West Africa 1<br><i>M. africanum 1</i> | West Africa 2<br><i>M. africanum 2</i> | Lineage 7   |
| Spoligotypes         | EAI                 | Beijing                    | CAS           | T, H, LAM, X, S                                        | AFRI_2, AFRI_3                         | AFRI_1                                 | Unknown     |
| Total SNPs           | 14,661              | 22,490                     | 9864          | 38,033                                                 | 4761                                   | 4560                                   | 2458        |
| Avg. SNPs/ genome    | 1970                | 1322                       | 1314          | 746                                                    | 1955                                   | 2064                                   | 1962        |
| (range)              | (1573 - 2094)       | (1041 - 1403)              | (1046 - 1389) | (15-962)                                               | (1831-2030)                            | (1932-2157)                            | (1921-1997) |
| Mean SNPs to MRCA    | 93                  | 69                         | 53            | 43                                                     | 185                                    | 207                                    | 90          |
| Diversity $\pi$      | 0.0102              | 0.0039                     | 0.0040        | 0.0077                                                 | 0.0058                                 | 0.0093                                 | 0.0035      |
| RDs present          | 239                 | 105, 207, 181, 150,<br>142 | 750           | 182, 183, 193, 122,<br>726, 219, 761, 115,<br>174, 724 | 711                                    | 702                                    | None        |
| No. Sub-lineages     | 8                   | 6                          | 5             | 36                                                     | 0                                      | 0                                      | 0           |
| No. Informative SNPs | 473                 | 106                        | 262           | 114                                                    | 372                                    | 220                                    | 898         |
| Coding SNPs (% NS)   | 419 (62.3)          | 91 (69.2)                  | 231 (64.1)    | 100 (69)                                               | 336 (65.2)                             | 196 (58.2)                             | 808 (64.1)  |

Abbreviations: MRCA: most recent common ancestor; RD: region of difference; NS: non-synonymous



### Supplementary Table 3

The set of 62 phylogenetically informative SNPs for MTBC typing

| lineage        | Position* | Gene coord. | Allele change | Codon number | Codon change | Amino acid change | Locus Id | Gene name     |
|----------------|-----------|-------------|---------------|--------------|--------------|-------------------|----------|---------------|
| lineage1       | 615938    | 1104        | G/A           | 368          | GAG/GAA      | E/E               | Rv0524   | <i>hemL</i>   |
| lineage1.1     | 4404247   | 1056        | G/A           | 352          | CTG/CTA      | L/L               | Rv3915   | -             |
| lineage1.1.1   | 3021283   | 711         | G/A           | 237          | CGG/CGA      | R/R               | Rv2707   | -             |
| lineage1.1.1.1 | 3216553   | 339         | G/A           | 113          | GTC/GTT      | V/V               | Rv2907c  | <i>rimM</i>   |
| lineage1.1.2   | 2622402   | 51          | G/A           | 17           | GCC/GCT      | A/A               | Rv2343c  | <i>dnaG</i>   |
| lineage1.1.3   | 1491275   | 1038        | G/A           | 346          | CAC/CAT      | H/H               | Rv1326c  | <i>glgB</i>   |
| lineage1.2.1   | 3479545   | 375         | C/A           | 125          | GCC/GCA      | A/A               | Rv3111   | <i>moaC1</i>  |
| lineage1.2.2   | 3470377   | 303         | C/T           | 101          | CAG/CAA      | Q/Q               | Rv3101c  | <i>ftsX</i>   |
| lineage2       | 497491    | 810         | G/A           | 270          | GAC/GAT      | D/D               | Rv0411c  | <i>glnH</i>   |
| lineage2.1     | 1881090   | 5787        | C/T           | 1929         | GGC/GGT      | G/G               | Rv1661   | <i>pkS7</i>   |
| lineage2.2     | 2505085   | 615         | G/A           | 205          | GCC/GCT      | A/A               | Rv2231c  | <i>cobC</i>   |
| lineage2.2.1   | 797736    | 804         | C/T           | 268          | CTC/CTT      | L/L               | Rv0697   | -             |
| lineage2.2.1.1 | 4248115   | 1602        | C/T           | 534          | GAC/GAT      | D/D               | Rv3795   | <i>embB</i>   |
| lineage2.2.1.2 | 3836274   | 618         | G/A           | 206          | TTC/TTT      | F/F               | Rv3417c  | <i>groEL1</i> |
| lineage2.2.2   | 346693    | 1059        | G/T           | 353          | TCG/TCT      | S/S               | Rv0284   | <i>eccC3</i>  |
| lineage3       | 3273107   | 894         | C/A           | 298          | GCC/GCA      | A/A               | Rv2936   | <i>drxA</i>   |
| lineage3.1.1   | 1084911   | 840         | G/A           | 280          | TAC/TAT      | Y/Y               | Rv0973c  | <i>accA2</i>  |
| lineage3.1.2   | 3722702   | 930         | G/C           | 310          | CTC/CTG      | L/L               | Rv3336c  | <i>trpS</i>   |
| lineage3.1.2.1 | 1237818   | 375         | C/G           | 125          | CTG/CTC      | L/L               | Rv1111c  | -             |
| lineage3.1.2.2 | 2874344   | 2142        | G/A           | 714          | CGC/CGT      | R/R               | Rv2555c  | <i>alaS</i>   |
| lineage4**     | 931123    | 171         | T/C           | 57           | TAT/TAC      | Y/Y               | Rv0835   | <i>lpqQ</i>   |
| lineage4.1     | 62657     | 2262        | G/A           | 754          | CCG/CCA      | P/P               | Rv0058   | <i>dnaB</i>   |
| lineage4.1.1   | 514245    | 1077        | C/T           | 359          | GTG/GTA      | V/V               | Rv0425c  | <i>ctpH</i>   |
| lineage4.1.1.1 | 1850119   | 1917        | C/T           | 639          | ACG/ACA      | T/T               | Rv1640c  | <i>lysX</i>   |
| lineage4.1.1.2 | 541048    | 444         | T/G           | 148          | TCA/TCC      | S/S               | Rv0450c  | <i>mmpL4</i>  |
| lineage4.1.1.3 | 4229087   | 741         | C/T           | 247          | AAC/AAT      | N/N               | Rv3782   | <i>glfT1</i>  |
| lineage4.1.2   | 891756    | 514         | A/G           | 172          | TTG/CTG      | L/L               | Rv0798c  | <i>cfp29</i>  |
| lineage4.1.2.1 | 107794    | 195         | C/T           | 65           | GCC/GCT      | A/A               | Rv0098   | <i>fcoT</i>   |
| lineage4.2     | 2411730   | 393         | G/C           | 131          | TCC/TCG      | S/S               | Rv2152c  | <i>murC</i>   |
| lineage4.2.1   | 783601    | 1117        | A/C           | 373          | AGG/CGG      | R/R               | Rv0684   | <i>fusA1</i>  |
| lineage4.2.2   | 1487796   | 636         | C/A           | 212          | ATC/ATA      | I/I               | Rv1324   | -             |
| lineage4.2.2.1 | 1455780   | 286         | T/C           | 96           | TTG/CTG      | L/L               | Rv1299   | <i>prfA</i>   |
| lineage4.3     | 764995    | 1626        | C/G           | 542          | GCC/GCG      | A/A               | Rv0668   | <i>rpoC</i>   |
| lineage4.3.1   | 615614    | 780         | C/A           | 260          | GCC/GCA      | A/A               | Rv0524   | <i>hemL</i>   |
| lineage4.3.2   | 4316114   | 483         | G/A           | 161          | GCC/GCT      | A/A               | Rv3843c  | -             |
| lineage4.3.2.1 | 3388166   | 705         | C/G           | 235          | ACG/ACC      | T/T               | Rv3029c  | <i>fixA</i>   |
| lineage4.3.3   | 403364    | 2478        | G/A           | 826          | CCC/CCT      | P/P               | Rv0338c  | -             |
| lineage4.3.4   | 3977226   | 165         | G/A           | 55           | TTG/TTA      | L/L               | Rv3538   | -             |
| lineage4.3.4.1 | 4398141   | 1545        | G/A           | 515          | TCG/TCA      | S/S               | Rv3910   | -             |

|                  |         |      |     |      |         |     |         |               |
|------------------|---------|------|-----|------|---------|-----|---------|---------------|
| lineage4.3.4.2   | 1132368 | 744  | C/T | 248  | ACC/ACT | T/T | Rv1013  | <i>pks16</i>  |
| lineage4.3.4.2.1 | 1502120 | 522  | C/A | 174  | ACC/ACA | T/T | Rv1333  | -             |
| lineage4.4       | 4307886 | 1029 | G/A | 343  | CGC/CGT | R/R | Rv3834c | <i>serS</i>   |
| lineage4.4.1     | 4151558 | 660  | G/A | 220  | GGC/GGT | G/G | Rv3708c | <i>asd</i>    |
| lineage4.4.1.1   | 355181  | 684  | G/A | 228  | AAG/AAA | K/K | Rv0291  | <i>mycP3</i>  |
| lineage4.4.1.2   | 2694560 | 405  | G/C | 135  | CTC/CTG | L/L | Rv2397c | <i>cysA1</i>  |
| lineage4.4.2     | 4246508 | 3276 | G/A | 1092 | GCG/GCA | A/A | Rv3794  | <i>embA</i>   |
| lineage4.5       | 1719757 | 1032 | G/T | 344  | CCG/CCT | P/P | Rv1524  | -             |
| lineage4.6       | 3466426 | 666  | G/A | 222  | GTC/GTT | V/V | Rv3097c | <i>lipY</i>   |
| lineage4.6.1     | 4260268 | 879  | G/C | 293  | GCC/GCG | A/A | Rv3800c | <i>pks13</i>  |
| lineage4.6.1.1   | 874787  | 555  | G/A | 185  | CCG/CCA | P/P | Rv0781  | <i>ptrBa</i>  |
| lineage4.6.1.2   | 1501468 | 543  | G/C | 181  | CCG/CCC | P/P | Rv1332  | -             |
| lineage4.6.2     | 4125058 | 642  | G/C | 214  | CGG/CGC | R/R | Rv3683  | -             |
| lineage4.6.2.1   | 3570528 | 684  | C/G | 228  | CGG/CGC | R/R | Rv3198c | <i>uvrD2</i>  |
| lineage4.6.2.2   | 2875883 | 603  | C/T | 201  | CTG/CTA | L/L | Rv2555c | <i>alaS</i>   |
| lineage4.7       | 4249732 | 3219 | C/G | 1073 | GCC/GCG | A/A | Rv3795  | <i>embB</i>   |
| lineage4.8       | 3836739 | 153  | G/A | 51   | GAC/GAT | D/D | Rv3417c | <i>groEL1</i> |
| lineage4.9**     | 1759252 | 1572 | G/T | 524  | TCG/TCT | S/S | Rv1552  | <i>frdA</i>   |
| lineage5         | 1799921 | 339  | C/A | 113  | GGC/GGA | G/G | Rv1599  | <i>hisD</i>   |
| lineage6         | 1816587 | 399  | C/G | 133  | GTC/GTG | V/V | Rv1617  | <i>pykA</i>   |
| lineage7         | 1137518 | 543  | G/A | 181  | AAC/AAT | N/N | Rv1018c | <i>glmU</i>   |
| lineageBOV       | 2831482 | 1110 | A/G | 370  | GGT/GGC | G/G | Rv2515c | -             |
| lineageBOV_AFRI  | 1882180 | 477  | C/T | 159  | GCC/GCT | A/A | Rv1662  | <i>pks8</i>   |

\* based on reference NC\_000962.3

\*\* In these two cases the reference allele is the one specific to the lineage

**Supplementary Table 4** Lineage predictions for a set of reference genomes

| Species                | Strain                    | Accession   | Predicted lineage;<br>sub-lineage | Known lineage; sub-lineage<br>(reference)                         |
|------------------------|---------------------------|-------------|-----------------------------------|-------------------------------------------------------------------|
| <i>M. africanum</i>    | GM041182                  | NC_015758.1 | 6; BOV_AFRI                       | Mycobacterium africanum<br>West African 2 <sup>5</sup>            |
| <i>M. bovis</i>        | BCG strain Korea 1168P    | CP003900.2  | BOV; BOV_AFRI                     | Mycobacterium bovis BCG <sup>6</sup>                              |
| <i>M. bovis</i>        | BCG strain Mexico         | NC_016804.1 | BOV; BOV_AFRI                     | Mycobacterium bovis BCG <sup>7</sup>                              |
| <i>M. bovis</i>        | BCG strain Moreau RDJ     | AM412059.2  | BOV; BOV_AFRI                     | Mycobacterium bovis BCG <sup>8</sup>                              |
| <i>M. bovis</i>        | BCG strain Pasteur 1173P2 | NC_008769.1 | BOV; BOV_AFRI                     | Mycobacterium bovis BCG <sup>9</sup>                              |
| <i>M. bovis</i>        | BCG strain Tokyo 172      | NC_012207.1 | BOV; BOV_AFRI                     | Mycobacterium bovis BCG <sup>10</sup>                             |
| <i>M. tuberculosis</i> | 7199-99                   | NC_020089.1 | 4;4.1; 4.1.2; 4.1.2.1             | Hamburg clone, Haarlem<br>lineage <sup>11</sup>                   |
| <i>M. tuberculosis</i> | BT1                       | CP002883.1  | 2; 2.2; 2.2.1                     | Beijing/W                                                         |
| <i>M. tuberculosis</i> | BT2                       | CP002882.1  | 2; 2.2; 2.2.1                     | Beijing/W                                                         |
| <i>M. tuberculosis</i> | CAS NITR204               | NC_021193.1 | 3                                 | CAS strain <sup>12</sup>                                          |
| <i>M. tuberculosis</i> | CCDC5079                  | NC_017523.1 | 2; 2.2; 2.2.1                     | Beijing family <sup>13</sup>                                      |
| <i>M. tuberculosis</i> | CCDC5180                  | NC_017522.1 | 2; 2.2; 2.2.1                     | Beijing family <sup>13</sup>                                      |
| <i>M. tuberculosis</i> | CDC1551                   | NC_002755.2 | 4;4.1; 4.1.1; 4.1.1.3             | Euro-American lineage<br>strain, X family <sup>14</sup>           |
| <i>M. tuberculosis</i> | CTRI-2                    | CP002992.1  | 4;4.3; 4.3.3                      | Euro-American lineage 4<br>strain, LAM family, LAM9 <sup>15</sup> |
| <i>M. tuberculosis</i> | EAI5                      | CP006578.1  | 1; 1.1                            | East African Indian lineage<br>1, EAI5 <sup>16</sup>              |
| <i>M. tuberculosis</i> | EAI5 NITR206              | NC_021194.1 | 1; 1.1                            | East African Indian lineage<br>1, EAI5 <sup>12</sup>              |
| <i>M. tuberculosis</i> | F11                       | NC_009565.1 | 4;4.3; 4.3.2; 4.3.2.1             | Euro-American lineage 4<br>strain, LAM family, LAM3 <sup>17</sup> |
| <i>M. tuberculosis</i> | HKBS1                     | CP002871.1  | 2; 2.2; 2.2.1                     | Beijing/W Lineage                                                 |
| <i>M. tuberculosis</i> | KZN1435                   | NC_012943.1 | 4;4.3; 4.3.3                      | Euro-American lineage 4<br>strain, LAM family <sup>18</sup>       |
| <i>M. tuberculosis</i> | KZN4207                   | NC_016768.1 | 4;4.3; 4.3.3                      | Euro-American lineage 4<br>strain, LAM family <sup>18</sup>       |
| <i>M. tuberculosis</i> | KZN605                    | NC_018078.1 | 4;4.3; 4.3.3                      | Euro-American lineage 4<br>strain, LAM family <sup>18</sup>       |
| <i>M. tuberculosis</i> | RGTB327                   | CP003233.1  | 4;4.3; 4.3.4                      | Not reported <sup>19</sup>                                        |
| <i>M. tuberculosis</i> | RGTB423                   | NC_017528.1 | 1; 1.2.2                          | Not reported <sup>19</sup>                                        |

|                        |                         |             |                        |                                                                 |
|------------------------|-------------------------|-------------|------------------------|-----------------------------------------------------------------|
| <i>M. tuberculosis</i> | Strain Beijing NITR203  | NC_021054.1 | 2; 2.2; 2.2.1; 2.2.1.1 | Beijing strain <sup>12</sup>                                    |
| <i>M. tuberculosis</i> | Strain Erdman ATCC35801 | AP012340.1  | 4;4.1; 4.1.2; 4.1.2.1  | Euro-American lineage 4<br>strain, Haarlem strain <sup>20</sup> |
| <i>M. tuberculosis</i> | Strain Haarlem          | CP001664.1  | 4;4.1; 4.1.2; 4.1.2.1  | Euro-American lineage 4<br>strain, Haarlem strain               |
| <i>M. tuberculosis</i> | UT205                   | NC016934.1  | 4;4.3; 4.3.4; 4.3.4.2  | Euro-American lineage 4<br>strain, LAM family <sup>21</sup>     |

---

## Supplementary Table 5

### Lineage-specific SNPs at drug resistance genes

| Drug | Gene name       | Lineage  | Position** | Gene<br>Coord. | Allele<br>Change | Codon<br>Number | Codon<br>Change | Amino<br>Acid<br>Change | Locus<br>Tag |
|------|-----------------|----------|------------|----------------|------------------|-----------------|-----------------|-------------------------|--------------|
| INH  | <i>katG</i>     | 4        | 2154724*   | 1388           | C/A              | 463             | CGG/CTG         | R/L                     | Rv1908c      |
| INH  | <i>katG</i>     | BOV_AFRI | 2155503    | 609            | G/A              | 203             | ACC/ACT         | T/T                     | Rv1908c      |
| INH  | <i>inhA</i>     | 6        | 1674434    | 233            | T/C              | 78              | GTG/GCG         | V/A                     | Rv1484       |
| INH  | <i>ahpC</i>     | 3        | 2726105*   | -              | G/A              | -               | -               | -                       | -            |
|      | <i>promoter</i> |          |            |                |                  |                 |                 |                         |              |
| INH  | <i>kasA</i>     | 4.3.3    | 2518919    | 805            | G/A              | 269             | GGT/AGT         | G/S                     | Rv2245       |
| INH  | <i>ndh</i>      | 4.4.1    | 2102990    | 53             | A/G              | 18              | GTG/GCG         | V/A                     | Rv1854c      |
| INH  | <i>ndh</i>      | 5        | 2101921    | 1122           | C/T              | 374             | TCG/TCA         | S/S                     | Rv1854c      |
| INH  | <i>ndh</i>      | 7        | 2102218    | 825            | G/A              | 275             | GTC/GTT         | V/V                     | Rv1854c      |
| EMB  | <i>embA</i>     | 1        | 4245969    | 2737           | C/T              | 913             | CCG/TCG         | P/S                     | Rv3794       |
| EMB  | <i>embA</i>     | 1.1      | 4243848    | 616            | G/A              | 206             | GTG/ATG         | V/M                     | Rv3794       |
| EMB  | <i>embA</i>     | 1.2.1    | 4244420    | 1188           | G/C              | 396             | GTG/GTC         | V/V                     | Rv3794       |
| EMB  | <i>embA</i>     | 2.1      | 4246088    | 2856           | A/G              | 952             | CAA/CAG         | Q/Q                     | Rv3794       |
| EMB  | <i>embA</i>     | 2.2      | 4243460*   | 228            | C/T              | 76              | TGC/TGT         | C/C                     | Rv3794       |
| EMB  | <i>embA</i>     | 4.4.2    | 4246508    | 3276           | G/A              | 1092            | GCG/GCA         | A/A                     | Rv3794       |
| EMB  | <i>embA</i>     | 4.6.1.2  | 4245055    | 1823           | C/A              | 608             | ACC/AAC         | T/N                     | Rv3794       |
| EMB  | <i>embB</i>     | 2.2.1.1  | 4248115    | 1602           | C/T              | 534             | GAC/GAT         | D/D                     | Rv3795       |
| EMB  | <i>embB</i>     | 4.1.1.2  | 4246930    | 417            | G/C              | 139             | CAG/CAC         | Q/H                     | Rv3795       |
| EMB  | <i>embB</i>     | 4.4.1.2  | 4249012    | 2499           | G/A              | 833             | CTG/CTA         | L/L                     | Rv3795       |
| EMB  | <i>embB</i>     | 4.7      | 4249732    | 3219           | C/G              | 1073            | GCC/GCG         | A/A                     | Rv3795       |
| EMB  | <i>embB</i>     | 7        | 4248073    | 1560           | C/T              | 520             | ACC/ACT         | T/T                     | Rv3795       |
| EMB  | <i>embB</i>     | BOV_AFRI | 4246864    | 351            | C/T              | 117             | GTC/GTT         | V/V                     | Rv3795       |
| EMB  | <i>embC</i>     | 1        | 4241042    | 1180           | A/G              | 394             | AAC/GAC         | N/D                     | Rv3793       |
| EMB  | <i>embC</i>     | 3        | 4242075*   | 2213           | G/A              | 738             | CGG/CAG         | R/Q                     | Rv3793       |
| EMB  | <i>embC</i>     | 3.1.1    | 4241562    | 1700           | G/A              | 567             | CGC/CAC         | R/H                     | Rv3793       |
| EMB  | <i>embC</i>     | 4.1      | 4242803*   | 2941           | G/C              | 981             | GTG/CTG         | V/L                     | Rv3793       |
| EMB  | <i>embC</i>     | 4.1.1.1  | 4240897    | 1035           | C/G              | 345             | CGC/CGG         | R/R                     | Rv3793       |
| EMB  | <i>embC</i>     | 4.6.2.1  | 4242883    | 3021           | C/T              | 1007            | CCC/CCT         | P/P                     | Rv3793       |
| EMB  | <i>embC</i>     | 4.9      | 4242643    | 2781           | C/T              | 927             | CGC/CGT         | R/R                     | Rv3793       |

|     |             |          |         |      |     |      |         |     |         |
|-----|-------------|----------|---------|------|-----|------|---------|-----|---------|
| EMB | <i>embC</i> | 7        | 4240153 | 291  | G/A | 97   | TCG/TCA | S/S | Rv3793  |
| EMB | <i>embR</i> | 1        | 1417019 | 329  | C/T | 110  | TGC/TAC | C/Y | Rv1267c |
| EMB | <i>embR</i> | 4.6.1.2  | 1416410 | 938  | A/C | 313  | CTG/CGG | L/R | Rv1267c |
| EMB | <i>embR</i> | 4.6.2.1  | 1416702 | 646  | A/G | 216  | TAC/CAC | Y/H | Rv1267c |
| EMB | <i>embR</i> | 7        | 1416977 | 371  | T/C | 124  | CAC/CGC | H/R | Rv1267c |
| EMB | <i>ubiA</i> | 4.4.2    | 4268928 | 906  | G/A | 302  | GGC/GGT | G/G | Rv3806c |
| EMB | <i>ubiA</i> | 4.4.2    | 4269375 | 459  | C/T | 153  | GTG/GTA | V/V | Rv3806c |
| EMB | <i>ubiA</i> | BOV_AFRI | 4269351 | 483  | G/A | 161  | GCC/GCT | A/A | Rv3806c |
| EMB | <i>aftA</i> | 1.2.2    | 4238120 | 189  | G/A | 63   | CAG/CAA | Q/Q | Rv3792  |
| EMB | <i>aftA</i> | 4.1.2.1  | 4239298 | 1367 | C/T | 456  | GCC/GTC | A/V | Rv3792  |
| EMB | <i>aftA</i> | 4.4      | 4238963 | 1032 | C/T | 344  | CAC/CAT | H/H | Rv3792  |
| EMB | <i>aftA</i> | 5        | 4239843 | 1912 | A/C | 638  | AAG/CAG | K/Q | Rv3792  |
| EMB | <i>aftA</i> | 7        | 4238778 | 847  | G/A | 283  | GTG/ATG | V/M | Rv3792  |
| EMB | <i>nuoD</i> | 2.1      | 3513538 | 201  | A/T | 67   | GAA/GAT | E/D | Rv3148  |
| EMB | <i>nuoD</i> | 4.3.4.2  | 3514512 | 1175 | G/C | 392  | GGT/GCT | G/A | Rv3148  |
| RMP | <i>rpoB</i> | 3        | 762434  | 2628 | T/G | 876  | GGT/GGG | G/G | Rv0667  |
| RMP | <i>rpoB</i> | 4        | 763031  | 3225 | T/C | 1075 | GCT/GCC | A/A | Rv0667  |
| RMP | <i>rpoC</i> | 1        | 763884  | 515  | C/T | 172  | GCC/GTC | A/V | Rv0668  |
| RMP | <i>rpoC</i> | 1        | 763886  | 517  | C/A | 173  | CGG/AGG | R/R | Rv0668  |
| RMP | <i>rpoC</i> | 1.1      | 765171  | 1802 | C/T | 601  | CCG/CTG | P/L | Rv0668  |
| RMP | <i>rpoC</i> | 1.1.3    | 765230  | 1861 | G/A | 621  | GCG/ACG | A/T | Rv0668  |
| RMP | <i>rpoC</i> | 4.1      | 765150  | 1781 | G/A | 594  | GGG/GAG | G/E | Rv0668  |
| RMP | <i>rpoC</i> | 4.3      | 764995  | 1626 | C/G | 542  | GCC/GCG | A/A | Rv0668  |
| RMP | <i>rpoC</i> | 7        | 764013  | 644  | A/C | 215  | GAG/GCG | E/A | Rv0668  |
| RMP | <i>rpoC</i> | 7        | 766955  | 3586 | G/A | 1196 | GAG/AAG | E/K | Rv0668  |
| STR | <i>rrs</i>  | 4.3.2    | 1472337 | -    | C/T | -    | -       | -   | -       |
| STR | <i>gid</i>  | 1        | 4407873 | 330  | C/A | 110  | GTG/GTT | V/V | Rv3919c |
| STR | <i>gid</i>  | 1.1.3    | 4407780 | 423  | C/T | 141  | GCG/GCA | A/A | Rv3919c |
| STR | <i>gid</i>  | 2.2      | 4407927 | 276  | T/G | 92   | GAA/GAC | E/D | Rv3919c |
| STR | <i>gid</i>  | 4        | 4407588 | 615  | T/C | 205  | GCA/GCG | A/A | Rv3919c |
| STR | <i>gid</i>  | 4.3      | 4408156 | 47   | A/C | 16   | CTT/CGT | L/R | Rv3919c |
| FLQ | <i>gyrA</i> | 1        | 8452    | 1151 | C/T | 384  | GCA/GTA | A/V | Rv0006  |
| FLQ | <i>gyrA</i> | 1.2.1    | 9260    | 1959 | G/C | 653  | CTG/CTC | L/L | Rv0006  |
| FLQ | <i>gyrA</i> | 3.1.2.2  | 9611    | 2310 | C/T | 770  | GAC/GAT | D/D | Rv0006  |
| FLQ | <i>gyrA</i> | 4.3.3    | 8040    | 739  | G/A | 247  | GGC/AGC | G/S | Rv0006  |
| FLQ | <i>gyrA</i> | 4.5      | 7892    | 591  | G/A | 197  | CTG/CTA | L/L | Rv0006  |
| FLQ | <i>gyrA</i> | 4.6.1    | 7539*   | 238  | A/G | 80   | ACC/GCC | T/A | Rv0006  |

|     |             |         |          |      |     |     |         |     |         |
|-----|-------------|---------|----------|------|-----|-----|---------|-----|---------|
| FLQ | <i>gyrA</i> | 5       | 9566     | 2265 | C/T | 755 | TAC/TAT | Y/Y | Rv0006  |
| FLQ | <i>gyrA</i> | 7       | 8876     | 1575 | C/T | 525 | TAC/TAT | Y/Y | Rv0006  |
| FLQ | <i>gyrB</i> | 1       | 6112     | 873  | G/C | 291 | ATG/ATC | M/I | Rv0005  |
| FLQ | <i>gyrB</i> | 1.1.2   | 6124     | 885  | C/T | 295 | GCC/GCT | A/A | Rv0005  |
| FLQ | <i>gyrB</i> | 4.3.2.1 | 5520     | 281  | C/T | 94  | CCG/CTG | P/L | Rv0005  |
| FLQ | <i>gyrB</i> | 4.3.2.1 | 7222     | 1983 | C/T | 661 | AGC/AGT | S/S | Rv0005  |
| PZA | <i>rpsA</i> | 2       | 1834177* | 636  | A/C | 212 | CGA/CGC | R/R | Rv1630  |
| PZA | <i>rpsA</i> | 7       | 1834916  | 1375 | A/C | 459 | ACC/CCC | T/P | Rv1630  |
| ETH | <i>ethA</i> | 1.2.2   | 4326439  | 1035 | G/T | 345 | AAC/AAA | N/K | Rv3854c |
| ETH | <i>ethA</i> | 3.1.2.2 | 4326176  | 1298 | T/G | 433 | GAG/GCG | E/A | Rv3854c |
| ETH | <i>ethA</i> | 4.6.2.2 | 4326739  | 735  | G/C | 245 | CGC/CGG | R/R | Rv3854c |
| ETH | <i>ethR</i> | 4.6.2.2 | 4328004  | 456  | G/A | 152 | GTG/GTA | V/V | Rv3855  |
| ETH | <i>inhA</i> | 6       | 1674434  | 233  | T/C | 78  | GTG/GCG | V/A | Rv1484  |
| AMI | <i>rrs</i>  | 4.3.2   | 1472337  | -    | C/T | -   | -       | -   | -       |
| AMI | <i>gid</i>  | 1       | 4407873* | 330  | C/A | 110 | GTG/GTT | V/V | Rv3919c |
| AMI | <i>gid</i>  | 1.1.3   | 4407780  | 423  | C/T | 141 | GCG/GCA | A/A | Rv3919c |
| AMI | <i>gid</i>  | 2.2     | 4407927* | 276  | T/G | 92  | GAA/GAC | E/D | Rv3919c |
| AMI | <i>gid</i>  | 4       | 4407588* | 615  | T/C | 205 | GCA/GCG | A/A | Rv3919c |
| AMI | <i>gid</i>  | 4.3     | 4408156* | 47   | A/C | 16  | CTT/CGT | L/R | Rv3919c |
| CAP | <i>rrs</i>  | 4.3.2   | 1472337  | -    | C/T | -   | -       | -   | -       |
| KAN | <i>rrs</i>  | 4.3.2   | 1472337  | -    | C/T | -   | -       | -   | -       |
| AMK | <i>rrs</i>  | 4.3.2   | 1472337  | -    | C/T | -   | -       | -   | -       |
| CAP | <i>tlyA</i> | 7       | 1918281  | 342  | A/C | 114 | GGA/GGC | G/G | Rv1694  |

Abbreviations: RMP: rifampicin; INH: isoniazid; STR: streptomycin; ETH: ethionamide; EMB: ethambutol; PZA: pyrazinamide; AMI: Aminoglycosides; AMK: amikacin; CAP: capreomycin; KAN: kanamycin; FLQ: fluoroquinolones; MOX: moxifloxacin; OFX: ofloxacin; PAS: para-aminosalicylic acid; NS: non-synonymous; S: synonymous; I: intergenic; Ref: reference; Alt: alternative; NT: nucleotide. \*\*based on reference NC\_00096.3

\* Also described in <sup>22</sup>

## Supplementary Table 6

Non-synonymous lineage-specific SNPs at known epitopes in H37Rv

| Epitope Id       | Start   | End     | Locus Id | Amino acid sequence       | Lineage_SNP                  |
|------------------|---------|---------|----------|---------------------------|------------------------------|
| 7000006195549910 | 157070  | 157129  | Rv0129c  | AAVGLSMSGGSSALILAAAYP     | 3_157129                     |
| 7000006195549960 | 2952682 | 2952741 | Rv2626c  | DDDRHLHGMLTDRDIVIKGLA     | 7_2952738                    |
| 7000006195549960 | 2952712 | 2952771 | Rv2626c  | DRDIVIKGLAAGLDPNTATA      | 7_2952738                    |
| 7000006195549960 | 2955088 | 2955147 | Rv2628   | IRAVGPYAWAGRCGRIGRWG      | 7_2955128                    |
| 7000006195549970 | 2955358 | 2955417 | Rv2628   | DWPAAYAIGEHLSEIYAVAV      | 7_2955392                    |
| 7000006195549970 | 2955058 | 2955117 | None     | MSTQRPRHSGIRAVGPYAWA      | 4.8_2955061                  |
| 7000006195549970 | 2955118 | 2955177 | Rv2628   | GRCGRIGRWGVHQEAMMNLA      | 7_2955128                    |
| 7000006195549980 | 1403228 | 1403287 | Rv1255c  | RRARWVVRMLTSLLMFPGRD      | 5_1403266                    |
| 7000006195550000 | 3079639 | 3079698 | Rv2770c  | VANRALLAELTATNILGQNV      | 1.1.1.1_3079685              |
| 7000006195550000 | 3079669 | 3079728 | Rv2770c  | TATNILGQNVSAIAATEARY      | 1.1.1.1_3079685              |
| 7000006195550000 | 3079819 | 3079878 | Rv2770c  | SHITNPAGLAHQAAAVGQAG      | 4_3079877                    |
| 7000006195550020 | 2955058 | 2955102 | None     | MSTQRPRHSGIRAVG           | 4.8_2955061                  |
| 7000006195550020 | 2955088 | 2955132 | Rv2628   | IRAVGPYAWAGRCGR           | 7_2955128                    |
| 7000006195550020 | 2955103 | 2955147 | Rv2628   | PYAWAGRCGRIGRWG           | 7_2955128                    |
| 7000006195550020 | 2955118 | 2955162 | Rv2628   | GRCGRIGRWGVHQEA           | 7_2955128                    |
| 7000006195550040 | 2955358 | 2955402 | Rv2628   | DWPAAYAIGEHLSE            | 7_2955392                    |
| 7000006195550040 | 2955373 | 2955417 | Rv2628   | YAIGEHLSEIYAVAV           | 7_2955392                    |
| 7000006195549590 | 4352424 | 4352468 | Rv3874   | AQAAVVRFQEAANKQ           | 7_4352439                    |
| 7000006195549590 | 4352439 | 4352483 | Rv3874   | VRFQEAANKQKQELD           | 4.1.2.1_4352475<br>7_4352439 |
| 7000006195549590 | 4352454 | 4352498 | Rv3874   | AANKQKQELDEISTN           | 4.1.2.1_4352475              |
| 7000006195549590 | 4352469 | 4352513 | Rv3874   | KQELDEISTNIRQAG           | 4.1.2.1_4352475              |
| 7000006195549600 | 686965  | 687012  | Rv0589   | VAFRAGLVM EAGSKVT         | 4.9_686972                   |
| 7000006195549610 | 4351141 | 4351194 | Rv3873   | PMLAAAAGWQTLAALDA         | 4.1.2.1_4351160              |
| 7000006195549620 | 4351723 | 4351776 | Rv3873   | GPMQQLTQPLQQVTSLFS        | 1_4351759                    |
| 7000006195549620 | 4351753 | 4351806 | Rv3873   | QQVTSLSFSQVGGTGGGNP       | 1_4351759                    |
| 7000006195549640 | 352028  | 352081  | Rv0288   | AMEDLV RAYHAMSSTHEA       | 6_352058                     |
| 7000006195549640 | 352058  | 352111  | Rv0288   | AMSSTHEANTMAMMARDT        | 6_352058                     |
| 7000006195549640 | 3378771 | 3378830 | Rv3019c  | YAGTLQSLGADIASEQAVLS      | 1_3378828                    |
| 7000006195549640 | 3378801 | 3378860 | Rv3019c  | DIASEQAVLSSAWQGDTGIT      | 1_3378828                    |
| 7000006195549650 | 3378921 | 3378980 | Rv3019c  | SMSGTHESNTMAMLARDGAE      | 7_3378952                    |
| 7000006195549650 | 3378951 | 3378998 | Rv3019c  | MAMLARDGAEAAKWGG          | 7_3378952                    |
| 7000006195549670 | 4352418 | 4352462 | Rv3874   | TAAQA VVRFQEAAN           | 7_4352439                    |
| 7000006195549670 | 4352430 | 4352474 | Rv3874   | AAVVRFQEAANKQKQ           | 7_4352439                    |
| 7000006195549670 | 4352442 | 4352486 | Rv3874   | RFQEAANKQKQELDE           | 4.1.2.1_4352475              |
| 7000006195549670 | 4352466 | 4352510 | Rv3874   | QKQELDEISTNIRQA           | 4.1.2.1_4352475              |
| 7000006195549690 | 4352424 | 4352483 | Rv3874   | AQAAVVRFQEAANKQKQELD      | 4.1.2.1_4352475<br>7_4352439 |
| 7000006195549690 | 4352454 | 4352513 | Rv3874   | AANKQKQELDEISTNIRQAG      | 4.1.2.1_4352475              |
| 7000006195549730 | 1020433 | 1020477 | Rv0915c  | LGQNSAAIAATQAEY           | 5_1020452                    |
| 7000006195549780 | 4352409 | 4352483 | Rv3874   | AAGTAAQA VVRFQEAANKQKQELD | 4.1.2.1_4352475<br>7_4352439 |



|                  |         |         |         |                             |                 |
|------------------|---------|---------|---------|-----------------------------|-----------------|
| 7000006195549780 | 4352454 | 4352528 | Rv3874  | AANKQKQELDEISTNIRQAGVQYSR   | 4.1.2.1_4352475 |
| 7000006195549790 | 3187480 | 3187554 | Rv2875  | GASVTVTGQGNLKVGNADVVC GG V  | 4.3.1_3187535   |
| 7000006195549790 | 3187525 | 3187599 | Rv2875  | GNADVVC GG VSTANATVYMIDSVLM | 4.3.1_3187535   |
| 7000006195549810 | 4357092 | 4357151 | Rv3878  | AAELAPRVVATVPQLVQLAP        | 4.1_4357123     |
| 7000006195549820 | 4266002 | 4266061 | Rv3804c | FYSDWYQPACGKAGCQTYKW        | 4.4.1.2_4266036 |
| 7000006195549820 | 4266032 | 4266091 | Rv3804c | GKAGCQTYKWETFLTSELPG        | 4.4.1.2_4266036 |
| 7000006195549850 | 4265981 | 4266040 | Rv3804c | PVGGQSSFYSDWYQPACGKA        | 4.4.1.2_4266036 |
| 7000006195549850 | 4266011 | 4266070 | Rv3804c | DWYQPACGKAGCQTYKWETF        | 4.4.1.2_4266036 |
| 7000006195549570 | 2227288 | 2227359 | Rv1983  | NGIVTAPTAVNVLLSIPTSPFAI     | 7_2227339       |
| 7000006195549570 | 3351437 | 3351508 | Rv2994  | PSWGLVVTMFAWGYLLDHVGERMV    | 1_3351472       |
| 7000006195549580 | 4357107 | 4357175 | Rv3878  | PRVVATVPQLVQLAPHAVQMSQN     | 4.1_4357123     |

---

### Supplementary Table 7

Sub-lineage proportions observed in the Russian dataset (n=850)<sup>23</sup> when using the 62-SNPs classification scheme.

| Sub-lineage                | Frequency |
|----------------------------|-----------|
| 2.2.1 (Modern Beijing)     | 518       |
| 4.8 (T spoligotype, RD219) | 71        |
| 4.2.1 (Ural)               | 68        |
| 4.3.3 (LAM, RD115)         | 57        |
| 4.1.2.1 (Haarlem, RD182)   | 36        |
| 4.1.2                      | 15        |
| 4.1 (X-type)               | 8         |
| 3 (CAS-Delhi)              | 5         |
| 4.9 (H37Rv-like)           | 5         |
| BOV ( <i>M. bovis</i> )    | 4         |
| 4.3.4.1 (LAM, RD174)       | 3         |
| 4.3.4.2 (LAM, RD174)       | 3         |
| 4.4.1.1 (S type)           | 3         |
| 4.7                        | 3         |
| 5 (West-Africa 1)          | 2         |
| 6 (West-Africa 2)          | 2         |
| 1.1.2 (EAI5;EAI3)          | 1         |
| 1.1.3 (EAI6)               | 1         |
| 2.2.1.1 (Beijing-RD150)    | 1         |
| 4.5 (RD122)                | 1         |
| Probable mixed infections* | 41        |

\*The most frequent combinations of strain types were: Modern Beijing (2.2.1) with LAM (4.3.3) (n=8); Modern Beijing with Ural (4.2.1) (n=8); Modern Beijing with Haarlem (4.1.2.1) (n=4); Modern Beijing with 4.8 (n=3); and Ural with 4.8.

## SUPPLEMENTARY REFERENCES

1. Zhang, H. *et al.* Genome sequencing of 161 Mycobacterium tuberculosis isolates from China identifies genes and intergenic regions associated with drug resistance. *Nature genetics* **45**, 1255–1260 (2013).
2. Firdessa, R., Berg, S. & Hailu, E. Mycobacterial lineages causing pulmonary and extrapulmonary tuberculosis, Ethiopia. *Emerging infectious ...* **19**, 460–463 (2013).
3. Blouin, Y. *et al.* Significance of the Identification in the Horn of Africa of an Exceptionally Deep Branching Mycobacterium tuberculosis Clade. *PLoS one* **7**, e52841 (2012).
4. Coll, F. *et al.* PolyTB: A genomic variation map for Mycobacterium tuberculosis. *Tuberculosis (Edinburgh, Scotland)* 1–9 (2014). doi:10.1016/j.tube.2014.02.005
5. Bentley, S. D. *et al.* The genome of Mycobacterium africanum West African 2 reveals a lineage-specific locus and genome erosion common to the M. tuberculosis complex. *PLoS neglected tropical diseases* **6**, e1552 (2012).
6. Joung, S., Jeon, S. & Lim, Y. Complete genome sequence of Mycobacterium bovis BCG Korea, the Korean vaccine strain for substantial production. *Genome Announcements* **1**, 87–88 (2013).
7. Orduña, P. *et al.* Genomic and proteomic analyses of Mycobacterium bovis BCG Mexico 1931 reveal a diverse immunogenic repertoire against tuberculosis infection. *BMC genomics* **12**, 493 (2011).
8. Gomes, L. H. F. *et al.* Genome sequence of Mycobacterium bovis BCG Moreau, the Brazilian vaccine strain against tuberculosis. *Journal of bacteriology* **193**, 5600–1 (2011).
9. Brosch, R. *et al.* Genome plasticity of BCG and impact on vaccine efficacy. *Proceedings of the National Academy of Sciences of the United States of America* **104**, 5596–601 (2007).
10. Seki, M. *et al.* Whole genome sequence analysis of Mycobacterium bovis bacillus Calmette-Guérin (BCG) Tokyo 172: a comparative study of BCG vaccine substrains. *Vaccine* **27**, 1710–6 (2009).
11. Roetzer, A. *et al.* Whole Genome Sequencing versus Traditional Genotyping for Investigation of a Mycobacterium tuberculosis Outbreak: A Longitudinal Molecular Epidemiological Study. *PLoS Med.* **10**, e1001387 (2013).
12. Narayanan, S. & Deshpande, U. Whole-genome sequences of four clinical isolates of Mycobacterium tuberculosis from Tamil Nadu, south India. *Genome announcements* **1**, 4430 (2013).

13. Zhang, Y. *et al.* Complete genome sequences of *Mycobacterium tuberculosis* strains CCDC5079 and CCDC5080, which belong to the Beijing family. *Journal of bacteriology* **193**, 5591–2 (2011).
14. Peterson, J. *et al.* Whole-genome comparison of *Mycobacterium tuberculosis* clinical and laboratory strains. *Journal of Bacteriology* **184**, 5479–5490 (2002).
15. Ilina, E. N. *et al.* Comparative genomic analysis of *Mycobacterium tuberculosis* drug resistant strains from Russia. *PloS one* **8**, e56577 (2013).
16. Rashdi, A. Al & Jadhav, B. Whole-genome sequencing and annotation of a clinical isolate of *Mycobacterium tuberculosis* from Mumbai, India. *Genome Announcements* **2**, 2014 (2014).
17. Gagneux, S. & Small, P. M. Global phylogeography of *Mycobacterium tuberculosis* and implications for tuberculosis product development. *The Lancet infectious diseases* **7**, 328–337 (2007).
18. Feuerriegel, S. *et al.* Thr202Ala in *thyA* is a marker for the Latin American Mediterranean lineage of the *Mycobacterium tuberculosis* complex rather than para-aminosalicylic acid resistance. *Antimicrobial agents and chemotherapy* **54**, 4794–8 (2010).
19. Madhavalatha, G. K. *et al.* Whole-genome sequences of two clinical isolates of *Mycobacterium tuberculosis* from Kerala, South India. *Journal of bacteriology* **194**, 4430 (2012).
20. Alix, E., Godreuil, S. & Blanc-Potard, A.-B. Identification of a Haarlem genotype-specific single nucleotide polymorphism in the *mgtC* virulence gene of *Mycobacterium tuberculosis*. *Journal of clinical microbiology* **44**, 2093–8 (2006).
21. Isaza, J. P. *et al.* Whole genome shotgun sequencing of one Colombian clinical isolate of *Mycobacterium tuberculosis* reveals DosR regulon gene deletions. *FEMS microbiology letters* **330**, 113–20 (2012).
22. Feuerriegel, S., Köser, C. U. & Niemann, S. Phylogenetic polymorphisms in antibiotic resistance genes of the *Mycobacterium tuberculosis* complex. *The Journal of antimicrobial chemotherapy* (2014). doi:10.1093/jac/dkt535
23. Casali, N. *et al.* Evolution and transmission of drug-resistant tuberculosis in a Russian population. *Nature genetics* **46**, 279–86 (2014).
24. Filliol, I. *et al.* Global Phylogeny of *Mycobacterium tuberculosis* Based on Single Nucleotide Polymorphism ( SNP ) Analysis : Insights into Tuberculosis Evolution , Phylogenetic Accuracy of Other DNA Fingerprinting Systems , and Recommendations for a Minimal Standard SNP Set. *J. Bacteriol.* **188**, 759–772 (2006).

25. Comas, I., Homolka, S., Niemann, S. & Gagneux, S. Genotyping of genetically monomorphic bacteria: DNA sequencing in *Mycobacterium tuberculosis* highlights the limitations of current methodologies. *PLoS one* **4**, e7815 (2009).
26. Homolka, S. et al. High Resolution Discrimination of Clinical *Mycobacterium tuberculosis* Complex Strains Based on Single Nucleotide Polymorphisms. *PLoS One* **7**, e39855 (2012).
